# Supplementary material
Source: ML conference proceedings conference paper supplement (https://openreview.net/forum?id=BXQtgwA2n0)
Supplement: supplementary_material [file attachment]

## 469 A Proofs

### 470 A.1 Proof of Theorem 4.1

471 *Proof.* For any two global state value functions  $V_{tot}^1$  and  $V_{tot}^2$ , let  $\pi_{tot}^1$  be the optimal global policy  
472 under  $\mathcal{T}_f^* V_{tot}^1$ , and we can get:

$$\begin{aligned}
& (\mathcal{T}_f^* V_{tot}^1)(\mathbf{o}) - (\mathcal{T}_f^* V_{tot}^2)(\mathbf{o}) \\
&= \sum_{\mathbf{a}} \pi_{tot}^1(\mathbf{a}|\mathbf{o}) \left[ r + \gamma \mathbb{E}_{\mathbf{o}'} [V_{tot}^1(\mathbf{o}')] - \alpha \log \left( \frac{\pi_{tot}^1(\mathbf{a}|\mathbf{o})}{\mu_{tot}(\mathbf{a}|\mathbf{o})} \right) \right] - \max_{\pi_{tot}} \sum_{\mathbf{a}} \pi_{tot}(\mathbf{a}|\mathbf{o}) \left[ r + \gamma \mathbb{E}_{\mathbf{o}'} [V_{tot}^2(\mathbf{o}')] - \alpha \log \left( \frac{\pi_{tot}(\mathbf{a}|\mathbf{o})}{\mu_{tot}(\mathbf{a}|\mathbf{o})} \right) \right] \\
&\leq \sum_{\mathbf{a}} \pi_{tot}^1(\mathbf{a}|\mathbf{o}) \left[ r + \gamma \mathbb{E}_{\mathbf{o}'} [V_{tot}^1(\mathbf{o}')] - \alpha \log \left( \frac{\pi_{tot}^1(\mathbf{a}|\mathbf{o})}{\mu_{tot}(\mathbf{a}|\mathbf{o})} \right) \right] - \sum_{\mathbf{a}} \pi_{tot}^1(\mathbf{a}|\mathbf{o}) \left[ r + \gamma \mathbb{E}_{\mathbf{o}'} [V_{tot}^2(\mathbf{o}')] - \alpha \log \left( \frac{\pi_{tot}^1(\mathbf{a}|\mathbf{o})}{\mu_{tot}(\mathbf{a}|\mathbf{o})} \right) \right] \\
&= \gamma \sum_{\mathbf{a}} \pi_{tot}^1(\mathbf{a}|\mathbf{o}) \mathbb{E}_{\mathbf{o}'} [V_{tot}^1(\mathbf{o}') - V_{tot}^2(\mathbf{o}')] \\
&\leq \gamma \|V_{tot}^1 - V_{tot}^2\|_{\infty}
\end{aligned}$$

473 Therefore, it follows that:

$$\|\mathcal{T}_f^* V_{tot}^1 - \mathcal{T}_f^* V_{tot}^2\|_{\infty} \leq \gamma \|V_{tot}^1 - V_{tot}^2\|_{\infty}$$

474 □

### 475 A.2 Proof of Proposition 4.2

476 *Proof.* For a behavior-regularized Dec-POMDP with  $f(\pi_{tot}, \mu_{tot}) = \log(\pi_{tot}/\mu_{tot})$ , the learning  
477 objective can be written as  $\max_{\pi_{tot}} \mathbb{E} [\sum_{t=0}^{\infty} \gamma^t (r(\mathbf{o}_t, \mathbf{a}_t) - \alpha \log(\pi_{tot}(\mathbf{a}_t|\mathbf{o}_t)/\mu_{tot}(\mathbf{a}_t|\mathbf{o}_t)))]$ . Its  
478 Lagrangian function can obtain when the optimal global policy is written as follows:

$$\begin{aligned}
L(\pi_{tot}, \beta, u) &= \sum_{\mathbf{o}} d_{\pi_{tot}}(\mathbf{o}) \sum_{\mathbf{a}} \pi_{tot}(\mathbf{a}|\mathbf{o}) \left( Q_{tot}(\mathbf{o}, \mathbf{a}) - \alpha \log \left( \frac{\pi_{tot}(\mathbf{a}|\mathbf{o})}{\mu_{tot}(\mathbf{a}|\mathbf{o})} \right) \right) \\
&\quad - \sum_{\mathbf{o}} d_{\pi_{tot}}(\mathbf{o}) \left[ u(\mathbf{o}) \left( \sum_{\mathbf{a}} \pi_{tot}(\mathbf{a}|\mathbf{o}) - 1 \right) + \sum_{\mathbf{a}} \beta(\mathbf{a}|\mathbf{o}) \pi_{tot}(\mathbf{a}|\mathbf{o}) \right],
\end{aligned}$$

479 where  $d_{\pi_{tot}}$  is the stationary joint observation distribution of the global policy  $\pi_{tot}$ .  $u$  and  $\beta$  are  
480 Lagrangian multipliers for the equality and inequality constraints.

481 According to the Karush-Kuhn-Tucker (KKT) conditions where the derivative of the Lagrangian  
482 objective function with respect to the global policy is zero at the optimal solution, it follows that:

$$\begin{aligned}
Q_{tot}(\mathbf{o}, \mathbf{a}) - \alpha \left( \log \left( \frac{\pi_{tot}(\mathbf{a}|\mathbf{o})}{\mu_{tot}(\mathbf{a}|\mathbf{o})} \right) + 1 \right) - u(\mathbf{o}) + \beta(\mathbf{a}|\mathbf{o}) &= 0 \tag{16} \\
\sum_{\mathbf{a}} \pi_{tot}(\mathbf{a}|\mathbf{o}) &= 1 \\
\beta(\mathbf{a}|\mathbf{o}) \pi_{tot}(\mathbf{a}|\mathbf{o}) &= 0 \\
0 \leq \pi_{tot}(\mathbf{a}|\mathbf{o}) \leq 1 \text{ and } 0 \leq \beta(\mathbf{a}|\mathbf{o}) &
\end{aligned}$$

483 From Eq. (16), we can further solve the optimal global policy as:

$$\pi_{tot}(\mathbf{a}|\mathbf{o}) = \mu_{tot}(\mathbf{a}|\mathbf{o}) \cdot \exp \left( \frac{Q_{tot}(\mathbf{o}, \mathbf{a}) - u(\mathbf{o}) + \beta(\mathbf{a}|\mathbf{o})}{\alpha} - 1 \right)$$

484 The above formula can be further simplified.  $\beta$  is the Lagrangian multiplier, and meets com-  
485plementary slackness  $\beta(\mathbf{a}|\mathbf{o}) \pi_{tot}(\mathbf{a}|\mathbf{o}) = 0$ . Considering the joint observation  $\mathbf{o}$  is fixed,  
486  $\exp \left( \frac{Q_{tot}(\mathbf{o}, \mathbf{a}) - u(\mathbf{o}) + \beta(\mathbf{a}|\mathbf{o})}{\alpha} - 1 \right)$  is always larger than 0. Therefore, for any positive probability  
487 action, its corresponding Lagrangian multiplier  $\beta(\mathbf{a}|\mathbf{o})$  is 0. Therefore,  $\pi_{tot}(\mathbf{a}|\mathbf{o})$  can be reformulated  
488 as:

$$\pi_{tot}(\mathbf{a}|\mathbf{o}) = \mu_{tot}(\mathbf{a}|\mathbf{o}) \cdot \exp \left( \frac{Q_{tot}(\mathbf{o}, \mathbf{a}) - u(\mathbf{o})}{\alpha} - 1 \right) \tag{17}$$

Bringing Eq. (17) into  $\sum_{\mathbf{a}} \pi_{tot}(\mathbf{a}|\mathbf{o}) = 1$ , we have:

$$\mathbb{E}_{\mathbf{a} \sim \mu_{tot}} \left[ \exp \left( \frac{Q_{tot}(\mathbf{o}, \mathbf{a}) - u(\mathbf{o})}{\alpha} - 1 \right) \right] = 1 \quad (18)$$

The left side of Eq. (18) can be seen as a continuous and monotonic function of  $u$ , so it has only one solution denoted as  $u^*$ , and we denote the corresponding policy  $\pi_{tot}$  as  $\pi_{tot}^*$ .

Integrating Eq. (17) into the expression of optimal global state value, we can get:

$$\begin{aligned} V_{tot}^*(\mathbf{o}) &= \mathcal{T}_f^* V_{tot}^*(\mathbf{o}) \\ &= \sum_{\mathbf{a}} \pi_{tot}^*(\mathbf{a}|\mathbf{o}) \left( Q_{tot}^*(\mathbf{o}, \mathbf{a}) - \alpha \log \left( \frac{\pi_{tot}^*(\mathbf{a}|\mathbf{o})}{\mu_{tot}(\mathbf{a}|\mathbf{o})} \right) \right) \\ &= \sum_{\mathbf{a}} \pi_{tot}^*(\mathbf{a}|\mathbf{o}) (u^*(\mathbf{o}) + \alpha) \\ &= u^*(\mathbf{o}) + \alpha \end{aligned}$$

To summarize, we obtain the optimality condition of the behavior regularized MDP with Reverse KL divergence as follows:

$$\begin{aligned} Q_{tot}^*(\mathbf{o}, \mathbf{a}) &= r(\mathbf{o}, \mathbf{a}) + \gamma \mathbb{E}_{\mathbf{o}'|\mathbf{o}, \mathbf{a}} [V_{tot}^*(\mathbf{o}')] \\ V_{tot}^*(\mathbf{o}) &= u^*(\mathbf{o}) + \alpha \\ \pi_{tot}^*(\mathbf{a}|\mathbf{o}) &= \mu_{tot}(\mathbf{a}|\mathbf{o}) \cdot \exp \left( \frac{Q_{tot}^*(\mathbf{o}, \mathbf{a}) - u^*(\mathbf{o})}{\alpha} - 1 \right) \end{aligned}$$

where  $u(\mathbf{o})$  is a normalization term and has a optimal value  $u^*$  that makes the corresponding optimal policy  $\pi_{tot}^*$  satisfy  $\sum_{\mathbf{a} \in \mathcal{A}^n} \pi_{tot}^*(\mathbf{a}|\mathbf{o}) = 1$ .

□

## B Experiment Settings

### B.1 Multi-Agent MuJoCo

Multi-agent Mujoco [7] is a benchmark framework developed for assessing and comparing the effectiveness of algorithms in continuous multi-agent robotic control. Within this framework, a robotic system is partitioned into independent agents, each tasked with controlling a specific set of joints. The agents collaborate harmoniously to accomplish shared objectives, such as acquiring the ability to walk through an environment, with the ultimate goal of maximizing the cumulative reward. Multi-agent MuJoCo environment consists of multiple different robot configurations, and it is often used for the study of novel MARL algorithms for decentralized coordination in isolation.

To generate the dataset transitions, we captured the interactions between the environment and trained online MARL algorithms. Specifically, we use HAPPO [16] algorithm to collect data. The expert dataset is generated by employing the converged HAPPO algorithm. This involves training the algorithm until it reaches a state of convergence, where the agents have learned optimal policies. The medium dataset is generated by first training a policy online using HAPPO, early-stopping the training, and collecting samples from this partially-trained policy. The medium-replay dataset consists of recording all samples in the replay buffer observed during training until the policy reaches the medium level of performance. The medium-expert dataset by mixing equal amounts of expert demonstrations and suboptimal data. For all datasets, the hyperparameter `env_args.agent_obs_k` (determines up to which connection distance agents will be able to form observations) is set to 1. The reward distribution of our datasets is listed in Table 2.

### B.2 The StarCraft Multi-Agent Challenge

The StarCraft Multi-Agent Challenge (SMAC) benchmark is chosen as our testing environment. Due to its high control complexity, SMAC is a popular multi-agent cooperative control environment for evaluating advanced MARL methods. It consists of a collection of StarCraft II microscenarios in

Table 2: The multi-agent MuJoCo dataset

| Scenario            | Quality       | Reward Distribution |
|---------------------|---------------|---------------------|
| 2-Agent Ant         | expert        | 2.06±0.35           |
|                     | medium        | 1.42±0.37           |
|                     | medium-expert | 1.74±0.48           |
|                     | medium-replay | 1.03±0.21           |
| 3-Agent Hopper      | expert        | 3.64±0.79           |
|                     | medium        | 3.16±1.00           |
|                     | medium-expert | 3.41±0.93           |
|                     | medium-replay | 2.37±0.69           |
| 6-Agent HalfCheetah | expert        | 2.79±1.76           |
|                     | medium        | 1.43±1.36           |
|                     | medium-expert | 2.11±1.71           |
|                     | medium-replay | 0.66±1.09           |

which two groups of units engage in combat. Agents based on the MARL algorithm control the first group’s units, while a built-in heuristic game AI bot with different difficulties controls the second group’s units. Scenarios vary in terms of the initial location, number and type of units, and elevated or impassable terrain. The available actions for each agent include no operation, move[direction], attack [enemy id], and stop. The reward that each agent receives is the same. The hit-point damage dealt and received determines the agents’ share of the reward. SMAC consists of several StarCraft II multi-agent micromanagement maps. We consider 4 representative battle maps, including 2 hard map (5m\_vs\_6m, 2c\_vs\_64zg), and 2 super hard maps (6h\_vs\_8z, corridor), as our experiment tasks. The task type and other details of the maps are listed in the Table 3.

Table 3: SMAC maps for experiments.

| Map Name   | Ally Units   | Enemy Units  | Type                     |
|------------|--------------|--------------|--------------------------|
| 5m_vs_6m   | 5 Marines    | 6 Marines    | homogeneous & asymmetric |
| 2c_vs_64zg | 2 Colossi    | 64 Zerglings | micro-trick: positioning |
| 6h_vs_8z   | 6 Hydralisks | 8 Zealots    | micro-trick: focus fire  |
| corridor   | 6 Zealots    | 24 Zerglings | micro-trick: wall off    |

The offline SMAC dataset used in this study is provided by [22], which is the largest open offline dataset on SMAC. Different from single-agent offline datasets, it considers the property of Dec-POMDP, which owns local observations and available actions for each agent. The dataset is collected from the trained MAPPO agent, and includes three quality levels: good, medium, and poor. For each original large dataset, we randomly sample 1000 episodes as our dataset.

## C Implementation Details

### C.1 Details of OMIGA

The local Q-value, state value networks and policy networks of OMIGA are represented by 3-layers ReLU activated MLPs with 256 units for each hidden layer. For the weight network, we use 2-layer ReLU activated MLPs with 64 units for each hidden layer. All the networks are optimized by Adam optimizer.

### C.2 Details of baselines

We compare OMIGA against four recent offline MARL algorithms: ICQ [40], OMAR [25], BCQ-MA and CQL-MA. For the ICQ and OMAR, we implement them based on the algorithm description in their papers. BCQ-MA is the multi-agent version of BCQ, and CQL-MA is the multi-agent version of CQL. BCQ-MA and CQL-MA use linear weighted value decomposition structure as  $Q_{tot} = \sum_{i=1}^n w_i(o)Q_i(o_i, a_i) + b(o), w^i \geq 0$  for the multi-agent setting. The policy constrain of BCQ-MA and the value regularization of CQL-MA are both imposed on the local Q-value.

549 In this paper, all experiments are implemented with pytorch and executed on NVIDIA V100 GPUs.

### 550 C.3 Hyperparameters

551 For multi-agent MuJoCo, the hyperparameters of OMIGA and baselines are listed in Table 4.  
 552 An important hyperparameter of OMIGA is the regularization hyperparameter  $\alpha$ . The higher  $\alpha$   
 553 encourages OMIGA staying near the behavioral distribution, and lower  $\alpha$  makes OMIGA more  
 554 optimistic. On most tasks, we use  $\alpha = 10$  to ensure good regularization effect. On the medium  
 555 quality dataset of HalfCheetah task, we choose  $\alpha = 1$ .

Table 4: Hyperparameters of OMIGA and baselines for multi-agent MuJoCo

| Hyperparameter                          | Value   |
|-----------------------------------------|---------|
| <b>Shared parameters</b>                |         |
| Q-value network learning rate           | 5e-4    |
| Policy network learning rate            | 5e-4    |
| Optimizer                               | Adam    |
| Target update rate                      | 0.005   |
| Batch size                              | 128     |
| Discount factor                         | 0.99    |
| Hidden dimension                        | 256     |
| Weight network hidden dimension         | 64      |
| <b>OMIGA</b>                            |         |
| State value network learning rate       | 5e-4    |
| Regularization parameter $\alpha$       | 1 or 10 |
| <b>Others</b>                           |         |
| Lagrangian coefficient (ICQ)            | 10      |
| Tradeoff factor $\alpha$ (OMAR, CQL-MA) | 1       |

556 For SMAC, the hyperparameters of OMIGA and baselines are listed in Table 5. On most tasks, we  
 557 use  $\alpha = 10$ . On the poor dataset of 6h\_vs\_8z map, the quality of the dataset is relatively poor. It  
 558 does not make much sense to make the policy close to the behavioral policy, so we choose  $\alpha = 2$  to  
 559 make the algorithm more radical.

560 On the most SMAC maps, the learning rate of all networks is set to 5e-4. The exception is the map  
 561 2c\_vs\_64zg, on this map, the learning rate of all networks is set to 1e-4.

Table 5: Hyperparameters of OMIGA and baselines for SMAC

| Hyperparameter                          | Value        |
|-----------------------------------------|--------------|
| <b>Shared parameters</b>                |              |
| Q-value network learning rate           | 5e-4 or 1e-4 |
| Policy network learning rate            | 5e-4 or 1e-4 |
| Optimizer                               | Adam         |
| Target update rate                      | 0.005        |
| Batch size                              | 128          |
| Discount factor                         | 0.99         |
| Hidden dimension                        | 256          |
| Weight network hidden dimension         | 64           |
| <b>OMIGA</b>                            |              |
| State value network learning rate       | 5e-4 or 1e-4 |
| Regularization parameter $\alpha$       | 2 or 10      |
| <b>Others</b>                           |              |
| Lagrangian coefficient (ICQ)            | 10           |
| Threshold (BCQ-MA)                      | 0.3          |
| Tradeoff factor $\alpha$ (OMAR, CQL-MA) | 1            |

Table 6: Average scores and standard deviations over 5 random seeds on the mixed offline SMAC datasets

| Map      | Dataset     | BCQ-MA     | CQL-MA     | ICQ        | OMAR       | OMIGA(ours)       |
|----------|-------------|------------|------------|------------|------------|-------------------|
| 6h_vs_8z | good-poor   | 11.41±0.44 | 9.56±0.25  | 11.00±0.36 | 9.17±0.19  | <b>11.88±0.27</b> |
| 6h_vs_8z | good-medium | 11.79±0.29 | 10.08±0.26 | 11.18±0.25 | 10.02±0.16 | <b>12.05±0.47</b> |
| 6h_vs_8z | medium-poor | 11.18±0.41 | 10.73±0.38 | 11.25±0.35 | 10.42±0.19 | <b>11.85±0.35</b> |
| corridor | good-poor   | 12.37±1.36 | 4.88±0.35  | 11.78±1.53 | 5.54±0.75  | <b>13.01±0.89</b> |
| corridor | good-medium | 13.32±0.71 | 5.77±1.30  | 12.98±0.62 | 6.63±0.74  | <b>14.02±1.04</b> |
| corridor | medium-poor | 8.11±0.35  | 6.18±0.59  | 8.27±0.48  | 6.25 ±0.48 | <b>9.70±1.40</b>  |

## D Additional Results

### D.1 Results on mixed datasets

We want to investigate whether OMIGA has superior performance when the datasets are mixed. Unlike BCQ-MA and OMAR, OMIGA doesn't need to learn a behavior policy. We choose two original datasets on the SMAC super hard maps 6h\_vs\_8z and corridor, and make mixed datasets by combining these SMAC datasets of different quality, including good-poor, good-medium, medium-poor datasets. Each mixed dataset is blended by 50% of each of the two original datasets. On these mixed suboptimal datasets, the behavior policy is heterogeneous. Therefore, it is more difficult for algorithms such as BCQ-MA and OMAR to learn an accurate behavior policy, making implicit value learning with the regularization framework of OMIGA more appealing.

Table 6 shows the results that OMIGA consistently outperforms other offline MARL baselines under all different mixed dataset experiments. Compared with the results on the original datasets, the performance of OMIGA has become more leading, indicating the benefits of implicit value regularization of OMIGA.
